# Supplementary material for: All-green Cellulose acetate/corn-cob Composite Membrane Filter with Combative Dye and Heavy Metal Adsorption Property
Source: Research Square preprint supplement (doi:10.21203/rs.3.rs-2324666/v1), 2022-12-21
Supplement: Supplementary file 1 [file 2584904f0942d1f7d4272e94.docx]

**Supporting Information**

**All-green Cellulose acetate/corn-cob Composite Membrane Filter with Combative Dye and Heavy Metal Adsorption Property**

Aswathy N R1, Rituparna Sen1, Snehashree Mongaraj1, Sudha G S1, Aswini Kumar Mohapatra2*

1Department of Plastic Engineering, CIPET: IPT, B 25 CNI complex, Patia, Bhubaneswar, Odisha, 751024

2Department of Manufacturing Engineering and Technology, CIPET: IPT, B 25 CNI complex, Patia, Bhubaneswar, Odisha, 751024

E mail*. draswinikumarmohapatra@gmail.com

*to whom correspondence should be addressed. Tel.: +919437496911


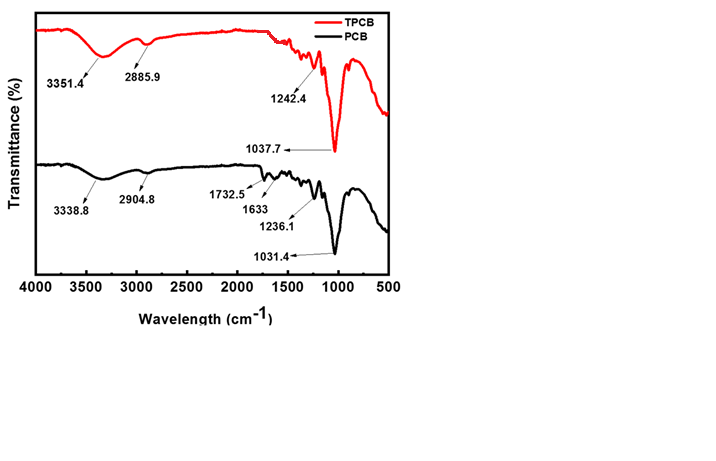


Figure S1 FTIR of PCB and TPCB


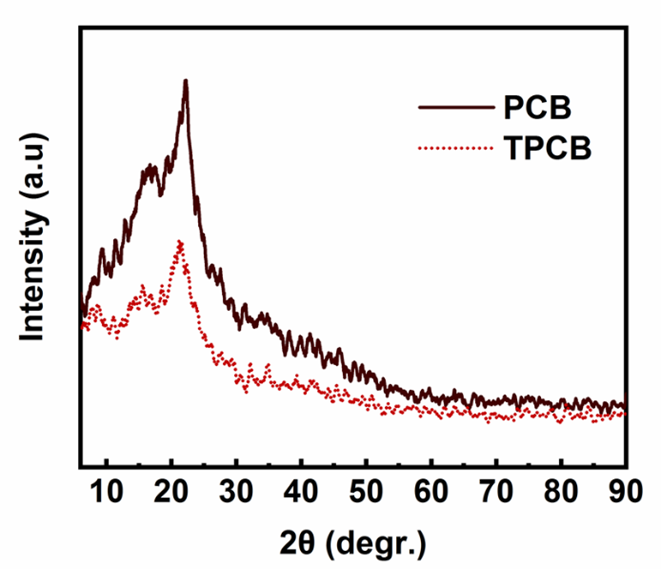


Figure S2 XRD plots of PCB and TPCB


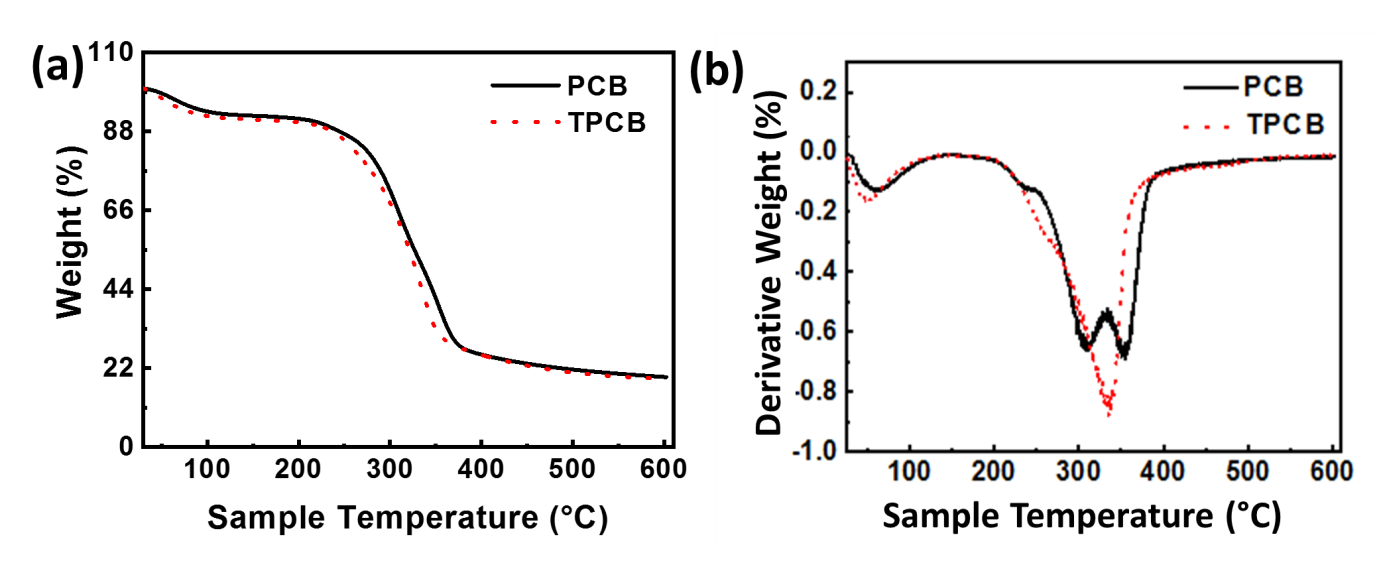


Figure S3 TGA and DTG of (a) PCB and (b) TPCB

Figure S4 FTIR of MCA, MCAPCB and MCATPCB


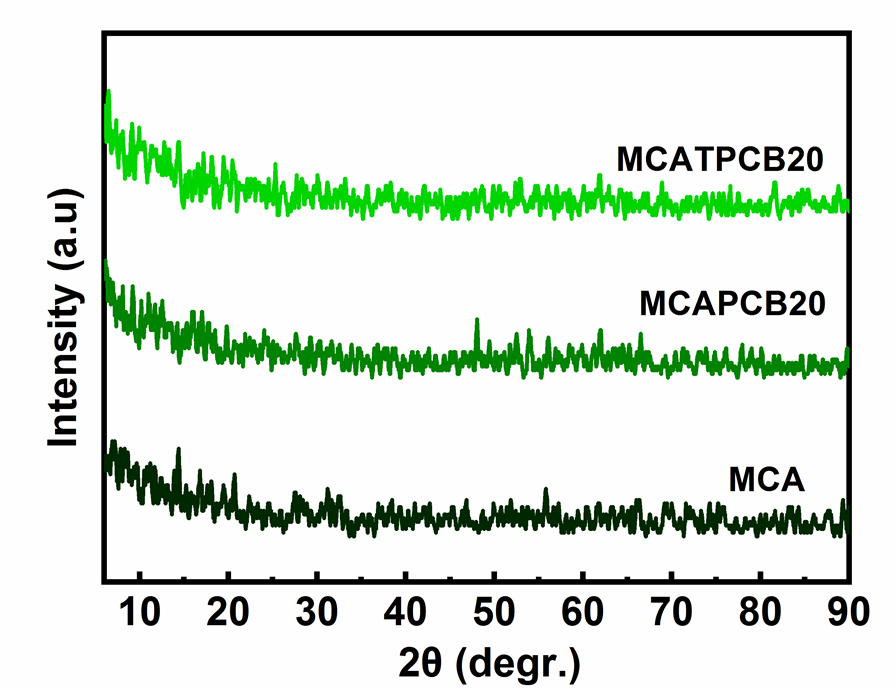


Figure S5 XRD plots of MCA, MCAPCB, and MCATPCB


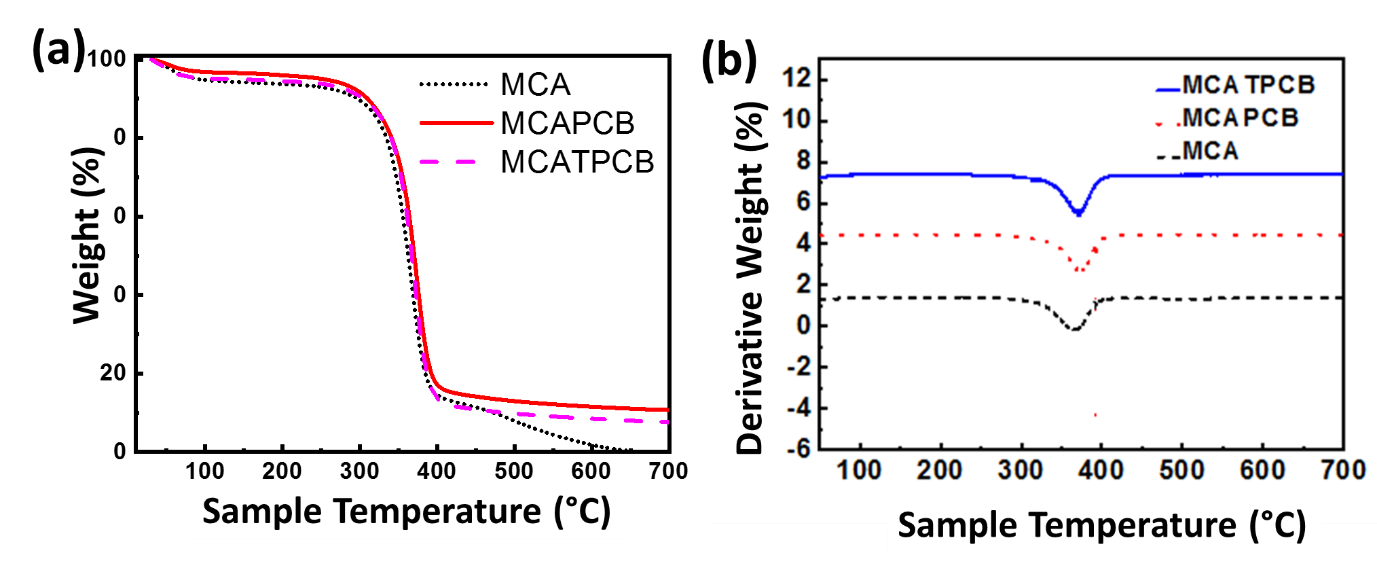


Figure S6 (a) TGA curves of MCA. MCAPCB, MCATPCB and (b) DTG curves of MCA. MCAPCB, MCATPCB


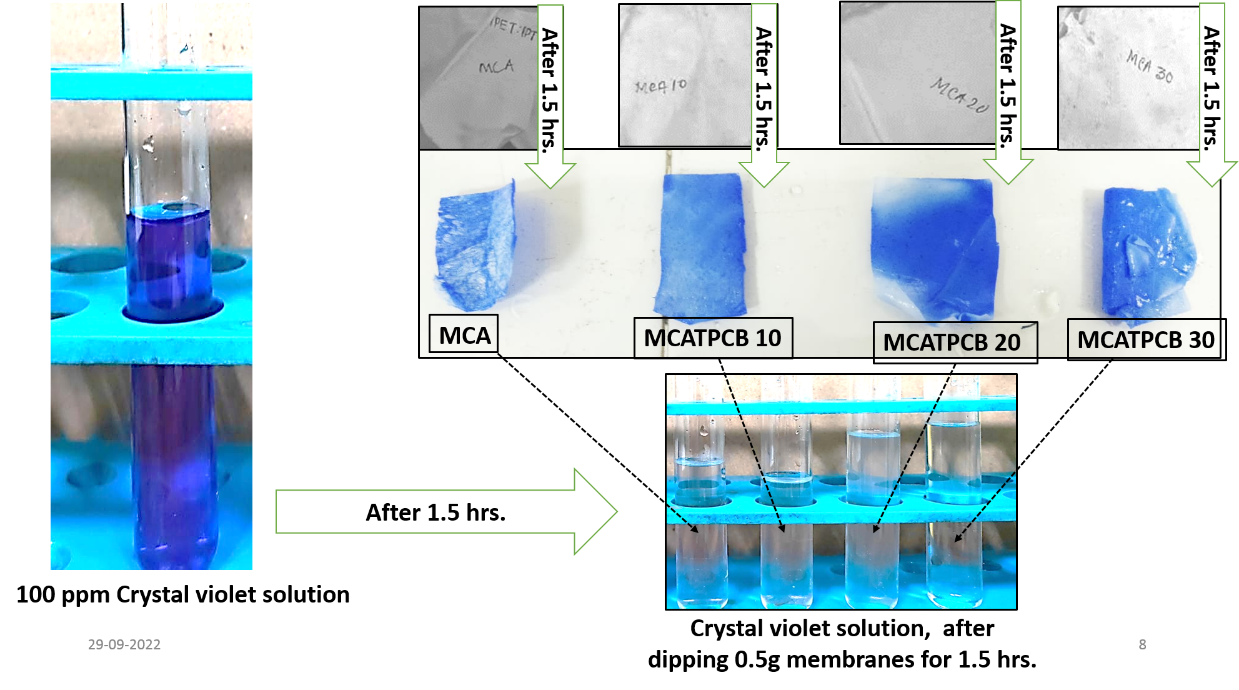


Figure S7 crystal violet adsorption performance by MCATPCB, AND MCA MEMBRANE


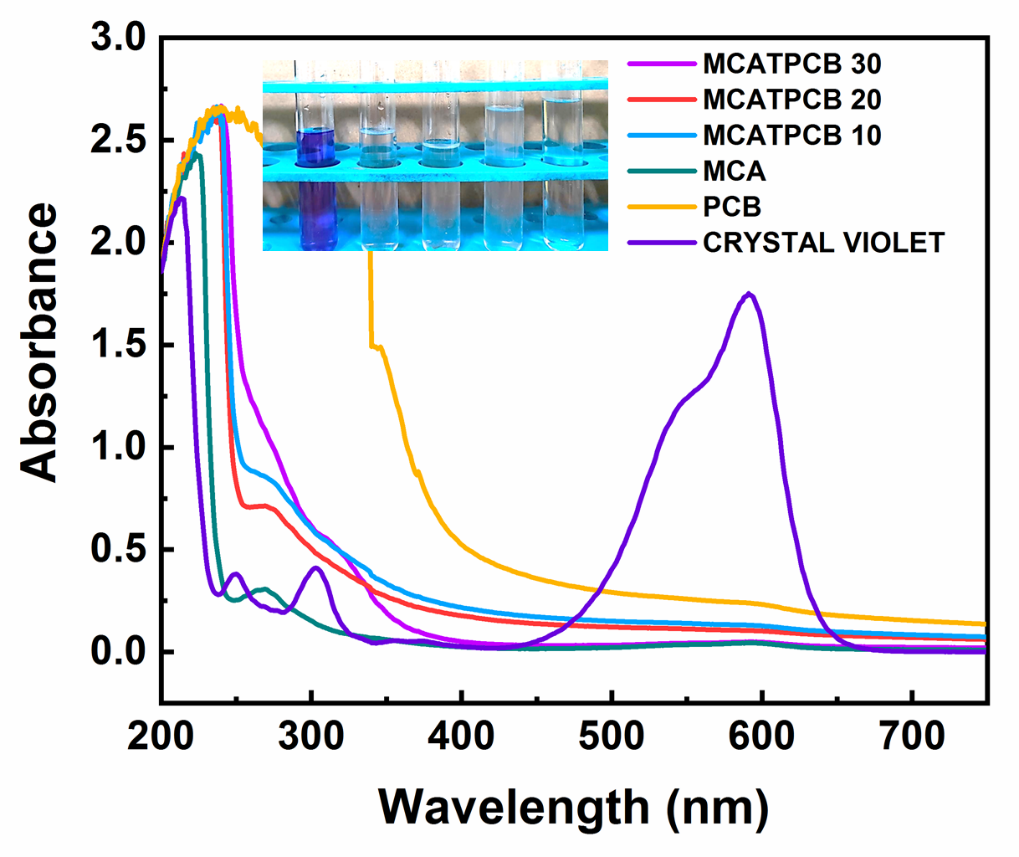


Figure S8 UV graphs of crystal violet solution (100 ppm) before immersion of membranes and after immersion of PCB, MCA, MCATPCB10, MCATPCB20, and MCATPCB30

**Table S1 Operating conditions for the Agilent ICP-OES**

|  | Condition 1 |
| --- | --- |
| Read time (s) | 5 |
| Stabilization time (s) | 15 |
| RF power (kW) | 1.2 |
| Nebulizer gas flow | 0.7 |
| Plasma Flow (L/min) | 12 |
| Aux Flow (L/min) | 1 |
| Viewing mode | Radial |
| Viewing Height (mm) | 8 |
| Makeup Flow (L/min) | 0 |
| Oxygen (%) | 0 |
|  | Condition 2 |
| Read time (s) | 5 |
| Stabilization time (s) | 15 |
| RF power (kW) | 1.2 |
| Nebulizer gas flow (L/min) | 0.7 |
| Plasma Flow (L/min) | 12 |
| Aux Flow (L/min) | 1 |
| Viewing mode | Axial |
| Viewing Height (mm) | 8 |
| Makeup Flow (L/min) | 0 |
| Oxygen (%) | 0 |
